# Supplementary material for: Multiple Introductions of Domestic Cat Feline Leukemia Virus in Endangered Florida Panthers
Source: PubMed Central journal article supplement (PMC6302599; doi:10.3201/eid2501.181347), 2019-01
Supplement: 18-1347-Techapp-s1.pdf [file 18-1347-Techapp-s1.pdf]

# Multiple Introductions of Feline Leukemia Virus in Endangered Florida Panthers

## Appendix

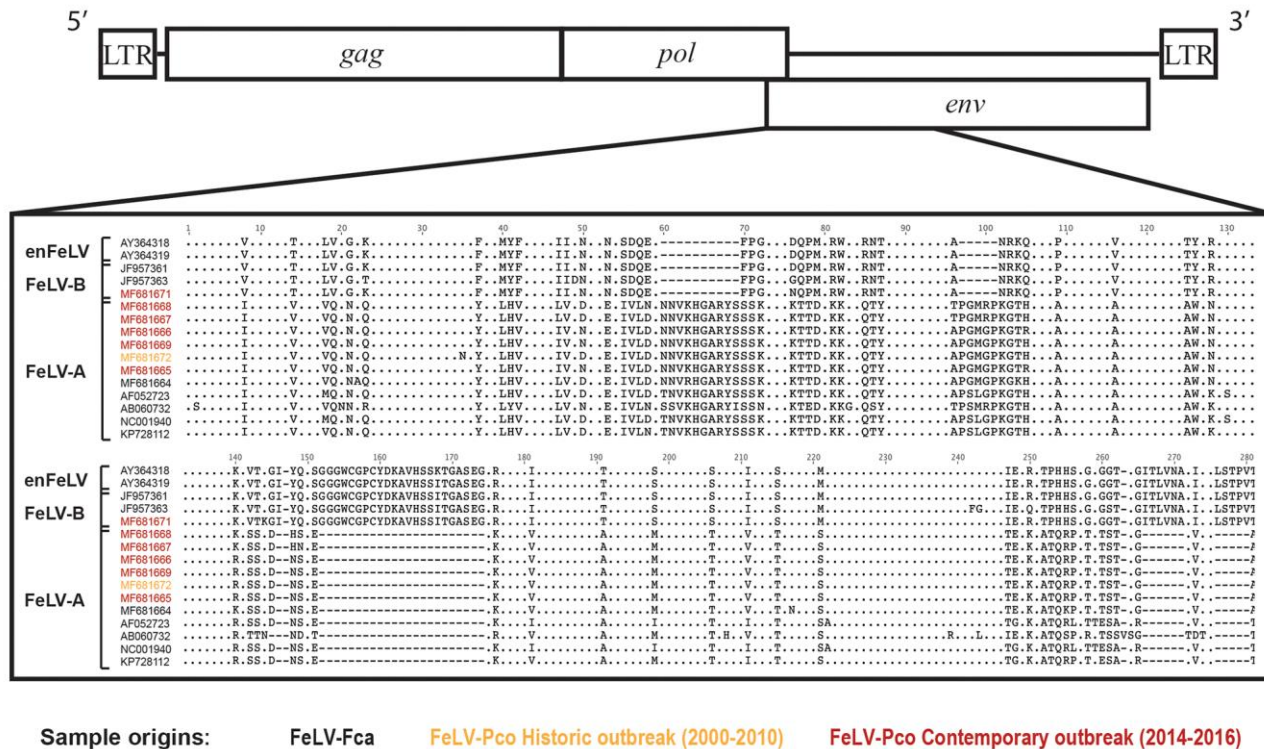

**Appendix Figure 1.** FeLV Env alignment of FeLV-A, FeLV-B, and enFeLV from published sequences and Florida panthers that support identification of FeLV-B in 1 Florida panther (MF681671). en, endogenous; FeLV, feline leukemia virus; LTR, long terminal repeat.

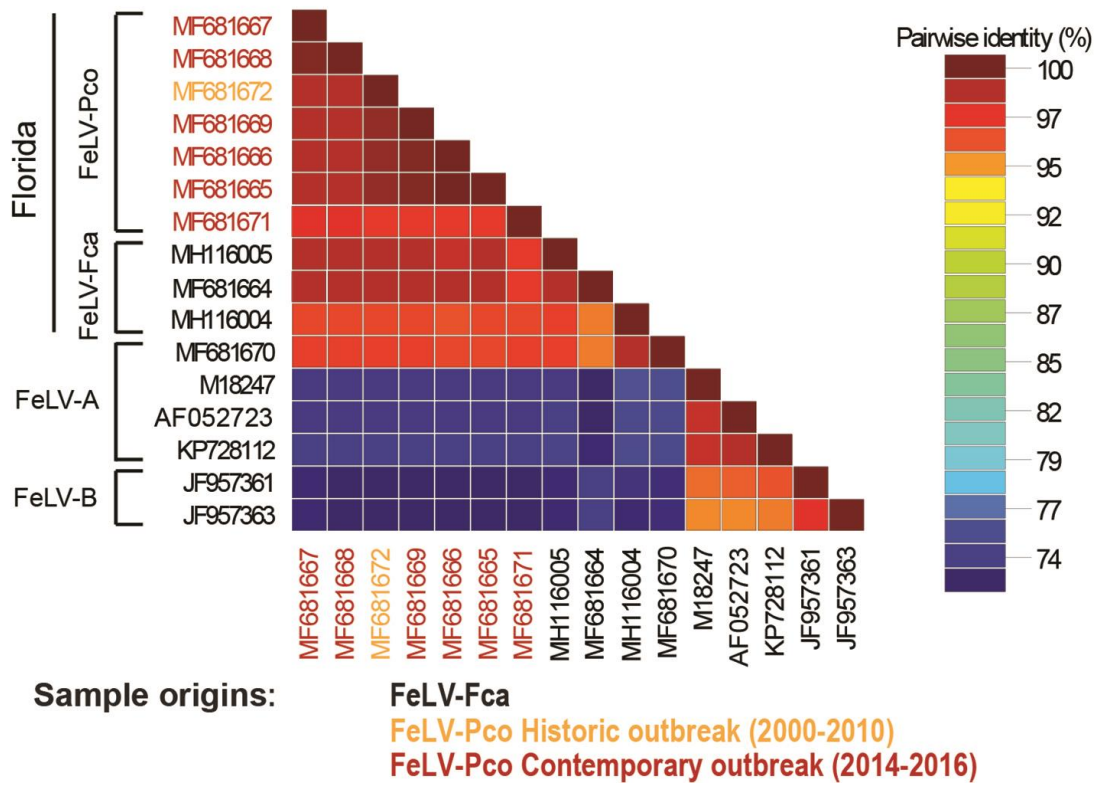

**Appendix Figure 2.** Heat map of FeLV-Fca and FeLV-Pco showing high homology of FeLV in Florida panthers and domestic cats from Florida. Published FeLV-A show 2 groups of related viruses. FeLV, feline leukemia virus.
